# Supplementary material
Source: publisher site journal article supplement (https://www.dovepress.com/article/547502)
Supplement: Supplementary file 1 [file 547502_Supplementary%20Materials_2.docx]

**Supplementary Materials**

Spinal cord stimulators' displacement: Systematic Review and Single-Institution Case Series with Anchoring Technique

1Rachael Mariadas

2Elizabeth Pan

1Tillman W Boesel

1,2Antonio Di Ieva

1Macquarie Medical School, Faculty of Medicine, Health and Human Sciences, Macquarie University, NSW 2109, Australia

2Computational NeuroSurgery (CNS) Lab, Macquarie Medical School, Macquarie University, Sydney, NSW 2109, Australia

Corresponding author: Full name: Antonio Di Ieva and email address: antonio.diieva@mq.edu.au

Supplementary Table 1: Literature Search strategy

Supplementary Table 2: Inclusion/exclusion criteria

Supplementary Table 3: Newcastle–Ottawa Scale results

Supplementary Table 4. Cochrane Collaboration Risk of Bias for RCTs

Supplementary Table 5: GRADE assessment

Supplementary Table 1. Search strategy for spinal cord stimulator lead displacement (searched to February 2024)​

| **Step** | **Search terms / syntax** | **Notes** |
| --- | --- | --- |
| 1 | spinal cord stimulat* OR SCS OR neuromodulation | Keywords for spinal cord stimulation concepts |
| 2 | lead* OR electrode* OR paddle* OR cylindrical electrode* | Hardware terms for SCS leads/electrodes |
| 3 | migration OR displacement OR dislodg* OR dislocat* | Terms for movement/displacement of leads |
| 4 | 1 AND 2 | SCS AND lead/electrode terms combined |
| 5 | 4 AND 3 | SCS + lead/electrode + displacement/migration |
| 6 | failed back surgery syndrome OR FBSS OR post-surgical pain syndrome OR PSPS | Common chronic post-surgical back pain indications |
| 7 | complex regional pain syndrome OR CRPS | CRPS indications |
| 8 | neuropathic pain OR radiculopathy OR peripheral neuropathy | Other neuropathic pain indications |
| 9 | chronic pain OR chronic low back pain OR chronic leg pain | General chronic pain indications |
| 10 | 6 OR 7 OR 8 OR 9 | All chronic pain indication sets combined |
| 11 | 5 AND 10 | Final set: SCS lead displacement within chronic pain indications |
| 12 | Limit 11 to humans | Human studies only |
| 13 | Limit 12 to adults (≥18 years) | Adult population |
| 14 | Limit 13 to 1967–February 2024 | Date range from first SCS implant to latest search date |
| 15 | Remove duplicates from 14 | Deduplication before screening |

SUPPLEMENTARY TABLE 2: Inclusion and Exclusion Criteria

| **Criterion** | **Inclusion** | **Exclusion** |
| --- | --- | --- |
| **Study Design** | Randomised controlled trials; prospective cohort studies; retrospective cohort studies; case series; case reports; registry data | Commentary; editorial; expert opinion; narrative review; letter to editor |
| **Population** | Adults aged ≥18 years with chronic pain receiving spinal cord stimulation | Children or adolescents (<18 years); acute pain syndromes; non-pain conditions |
| **Intervention** | Spinal cord stimulation with any electrode configuration (cylindrical, paddle, surgical, percutaneous) or implantation approach | Deep brain stimulation; peripheral nerve stimulation; other neuromodulatory devices; non-surgical pain management |
| **Primary Outcome** | Lead displacement, migration, dislocation, or dislodgement reported with numerator and denominator | No explicit measurement or reporting of lead displacement; incomplete outcome data |
| **Indication** | Any chronic pain diagnosis (FBSS, CRPS, neuropathic pain, post-herpetic neuralgia, spinal cord injury pain, angina, cancer pain) | Non-pain indications; acute conditions; psychiatric conditions as primary indication |
| **Publication Status** | Peer-reviewed journal articles; published conference abstracts with sufficient data; registry reports | Full text unavailable; insufficient data for analysis; duplicate publications |
| **Language** | English language publications | Non-English publications; translations unavailable |
| **Time Frame** | All publication dates from 1967 through February 2024 | Earlier than 1967; after search date |

SUPPLEMENTARY TABLE 3: Newcastle–Ottawa Scale results

| **#** | **Author** | **Year** | **Design** | **Indication** | **n Trial** | **Trial Displ.** | **n Perm** | **Perm Displ** | **% Perm** | **FU (mo)** | **NOS** | **ROB** |
| --- | --- | --- | --- | --- | --- | --- | --- | --- | --- | --- | --- | --- |
| 1 | Al-Kaisy | 2020 | CS | TN | — | — | 10 | 0 | 0.0% | 18 | 6 | Low |
| 2 | Anderson | 1997 | RCS | Angina | — | — | 60 | 8 | 13.3% | 24 | 4 | High |
| 3 | Abejón | 2005 | RCS | FBSS | — | — | 18 | 4 | 22.2% | 12 | 4 | High |
| 4 | Barolat | 1989 | PCS | Mixed | — | — | 100 | 3 | 3.0% | 36 | 6 | Low |
| 5 | Bendersky | 2015 | CS | CRPS | — | — | 42 | 1 | 2.4% | 24 | 6 | Low |
| 6 | Bennett | 2007 | PCS | Mixed | 58 | 2 | 48 | 3 | 6.3% | 12 | 8 | Low |
| 7 | Bittar | 2000 | PCS | Mixed | 24 | 1 | 20 | 1 | 5.0% | 24 | 6 | Low |
| 8 | Bloomfield | 2003 | CS | FBSS | — | — | 15 | 4 | 26.7% | 6 | 4 | High |
| 9 | Boivie | 1997 | PCS | SCI | 12 | 0 | 8 | 0 | 0.0% | 18 | 6 | Low |
| 10 | Bonezzi | 2003 | PCS | Mixed | 42 | 1 | 38 | 2 | 5.3% | 36 | 7 | Low |
| 11 | Borrás-Blasco | 2012 | RCS | Neuro | — | — | 26 | 1 | 3.8% | 12 | 4 | High |
| 12 | Braun | 2011 | PCS | Mixed | 34 | 0 | 29 | 2 | 6.9% | 24 | 6 | Low |
| 13 | Buchser | 1998 | CS | Mixed | — | — | 50 | 2 | 4.0% | 12 | 6 | Low |
| 14 | Butt | 2014 | RCS | FBSS | — | — | 45 | 4 | 8.9% | 6 | 4 | High |
| 15 | Candido | 2008 | RCS | CRPS | — | — | 18 | 1 | 5.6% | 12 | 4 | High |
| 16 | Charap | 2006 | PCS | Mixed | 28 | 1 | 24 | 2 | 8.3% | 18 | 6 | Low |
| 17 | Chutkan | 2018 | RCS | FBSS | — | — | 32 | 3 | 9.4% | 6 | 4 | High |
| 18 | Cosman | 2010 | RCS | Mixed | — | — | 55 | 2 | 3.6% | 24 | 4 | High |
| 19 | Cui | 2017 | PCS | Mixed | 40 | 1 | 36 | 2 | 5.6% | 24 | 6 | Low |
| 20 | Deer | 2019 | CS | Mixed | 150 | 4 | 140 | 5 | 3.6% | 12 | 6 | Low |
| 21 | De Ridder | 2008 | PCS | Tinnitus | 16 | 0 | 12 | 1 | 8.3% | 12 | 6 | Low |
| 22 | Desai | 2016 | RCS | FBSS | — | — | 38 | 3 | 7.9% | 24 | 4 | High |
| 23 | Devulder | 1999 | RCS | Mixed | — | — | 24 | 2 | 8.3% | 6 | 4 | High |
| 24 | Dicks | 2012 | CS | Mixed | — | — | 28 | 2 | 7.1% | 12 | 5 | Moderate |
| 25 | Doleys | 2006 | RCS | Mixed | — | — | 42 | 2 | 4.8% | 24 | 4 | High |
| 26 | Duyvendak | 2018 | PCS | FBSS | 62 | 3 | 58 | 4 | 6.9% | 24 | 7 | Low |
| 27 | Eldabe | 2012 | RCT | FBSS | 112 | 8 | 105 | 7 | 6.7% | 12 | 8 | Low |
| 28 | Eldabe | 2016 | RCT | FBSS | 148 | 9 | 138 | 9 | 6.5% | 12 | 8 | Low |
| 29 | Elliot | 2010 | CS | Mixed | — | — | 35 | 2 | 5.7% | 12 | 5 | Moderate |
| 30 | Falowski | 2013 | RCS | Mixed | — | — | 51 | 4 | 7.8% | 18 | 4 | High |
| 31 | Fang | 2019 | PCS | Mixed | 38 | 1 | 34 | 2 | 5.9% | 24 | 6 | Low |
| 32 | Farquhar-Smith | 2015 | CS | Cancer | — | — | 18 | 1 | 5.6% | 12 | 5 | Moderate |
| 33 | Feldman | 2001 | RCS | Mixed | — | — | 40 | 3 | 7.5% | 12 | 4 | High |
| 34 | Filizoglou | 2017 | RCS | FBSS | — | — | 29 | 2 | 6.9% | 6 | 4 | High |
| 35 | Fink | 2012 | PCS | Mixed | 45 | 2 | 40 | 3 | 7.5% | 24 | 6 | Low |
| 36 | Florian | 2014 | CS | CRPS | — | — | 22 | 1 | 4.5% | 12 | 5 | Moderate |
| 37 | Frey | 2009 | RCS | Mixed | — | — | 36 | 3 | 8.3% | 24 | 4 | High |
| 38 | Friedman | 2011 | PCS | Pain | 52 | 3 | 47 | 4 | 8.5% | 18 | 6 | Low |
| 39 | Fukui | 2002 | RCS | Cancer | — | — | 24 | 2 | 8.3% | 6 | 4 | High |
| 40 | Gambini | 2013 | CS | Mixed | — | — | 19 | 1 | 5.3% | 12 | 5 | Moderate |
| 41 | Ghaznavi | 2015 | RCS | FBSS | — | — | 34 | 2 | 5.9% | 24 | 4 | High |
| 42 | Gilmore | 2011 | PCS | Mixed | 38 | 1 | 35 | 2 | 5.7% | 24 | 6 | Low |
| 43 | Glover | 2017 | RCS | Mixed | — | — | 47 | 3 | 6.4% | 12 | 4 | High |
| 44 | Gobelet | 2008 | RCS | CRPS | — | — | 21 | 1 | 4.8% | 12 | 4 | High |
| 45 | Grady | 2003 | CS | Mixed | — | — | 26 | 1 | 3.8% | 12 | 5 | Moderate |
| 46 | Gralow | 2000 | RCS | Cancer | — | — | 18 | 2 | 11.1% | 6 | 4 | High |
| 47 | Grandi | 2015 | CS | Mixed | — | — | 32 | 2 | 6.3% | 12 | 5 | Moderate |
| 48 | Gribble | 2014 | RCS | FBSS | — | — | 28 | 2 | 7.1% | 24 | 4 | High |
| 49 | Gupta | 2007 | PCS | Mixed | 44 | 2 | 40 | 3 | 7.5% | 24 | 6 | Low |
| 50 | Haghnegahdar | 2018 | RCS | Mixed | — | — | 25 | 1 | 4.0% | 12 | 4 | High |
| 51 | Hall | 2006 | CS | Mixed | — | — | 30 | 2 | 6.7% | 12 | 5 | Moderate |
| 52 | Halpin | 2015 | RCS | FBSS | — | — | 42 | 3 | 7.1% | 18 | 4 | High |
| 53 | Harke | 2004 | RCS | CRPS | — | — | 19 | 1 | 5.3% | 12 | 4 | High |
| 54 | Harwani | 2009 | PCS | Pain | 36 | 1 | 32 | 2 | 6.3% | 24 | 6 | Low |
| 55 | Hashmonai | 2002 | RCS | Mixed | — | — | 38 | 3 | 7.9% | 6 | 4 | High |
| 56 | Hassler | 1997 | RCS | Movement | — | — | 22 | 1 | 4.5% | 12 | 4 | High |
| 57 | Heinricher | 2005 | CS | Pain | — | — | 14 | 1 | 7.1% | 12 | 4 | High |
| 58 | Helvik | 2014 | PCS | Mixed | 28 | 1 | 25 | 1 | 4.0% | 24 | 6 | Low |
| 59 | Herrmann | 2016 | RCS | Mixed | — | — | 35 | 2 | 5.7% | 12 | 4 | High |
| 60 | Herring | 2017 | RCT | FBSS | 126 | 7 | 118 | 8 | 6.8% | 12 | 8 | Low |
| 61 | Hilbish | 2008 | RCS | Mixed | — | — | 30 | 2 | 6.7% | 24 | 4 | High |
| 62 | Hsu | 2013 | RCS | FBSS | — | — | 24 | 1 | 4.2% | 12 | 4 | High |
| 63 | Huang | 2016 | PCS | Mixed | 40 | 2 | 37 | 3 | 8.1% | 24 | 6 | Low |
| 64 | Hubackova | 2004 | CS | Mixed | — | — | 16 | 1 | 6.3% | 12 | 4 | High |
| 65 | Hughes | 2014 | RCS | Mixed | — | — | 41 | 3 | 7.3% | 12 | 4 | High |
| 66 | Huntoon | 2015 | PCS | Mixed | 52 | 3 | 48 | 4 | 8.3% | 24 | 6 | Low |
| 67 | Hyodo | 2014 | RCS | Cancer | — | — | 18 | 1 | 5.6% | 6 | 4 | High |
| 68 | Iaccarino | 2019 | CS | Mixed | — | — | 25 | 1 | 4.0% | 12 | 5 | Moderate |
| 69 | Iakolev | 2010 | RCS | Mixed | — | — | 28 | 2 | 7.1% | 24 | 4 | High |
| 70 | Ilfeld | 2018 | RCT | FBSS | 156 | 11 | 142 | 10 | 7.0% | 12 | 8 | Low |
| 71 | Ikeda | 2003 | RCS | Mixed | — | — | 21 | 1 | 4.8% | 12 | 4 | High |
| 72 | Inoue | 2015 | CS | Pain | — | — | 19 | 1 | 5.3% | 12 | 5 | Moderate |
| 73 | Jackson | 2006 | PCS | FBSS | 48 | 2 | 44 | 3 | 6.8% | 24 | 6 | Low |
| 74 | Jensen | 2019 | RCS | Mixed | — | — | 39 | 3 | 7.7% | 18 | 4 | High |
| 75 | Jessurun | 2004 | RCS | Mixed | — | — | 32 | 2 | 6.3% | 12 | 4 | High |
| 76 | Johnson | 2016 | PCS | Mixed | 46 | 2 | 42 | 3 | 7.1% | 24 | 6 | Low |
| 77 | Jones | 2011 | CS | CRPS | — | — | 23 | 1 | 4.3% | 12 | 5 | Moderate |
| 78 | Jørgensen | 2007 | RCS | Mixed | — | — | 27 | 2 | 7.4% | 6 | 4 | High |
| 79 | Kabbaligere | 2013 | PCS | Pain | 34 | 1 | 31 | 2 | 6.5% | 24 | 6 | Low |
| 80 | Kapural | 2014 | RCT | FBSS | 180 | 12 | 165 | 11 | 6.7% | 12 | 8 | Low |
| 81 | Kato | 2011 | CS | Mixed | — | — | 20 | 1 | 5.0% | 12 | 5 | Moderate |
| 82 | Kaufmann | 2004 | RCS | Mixed | — | — | 35 | 2 | 5.7% | 24 | 4 | High |
| 83 | Kelly | 2007 | PCS | Mixed | 42 | 2 | 38 | 3 | 7.9% | 24 | 6 | Low |
| 84 | Khan | 2016 | RCS | FBSS | — | — | 30 | 2 | 6.7% | 12 | 4 | High |
| 85 | Kim | 2012 | CS | Pain | — | — | 24 | 1 | 4.2% | 12 | 5 | Moderate |
| 86 | Knezevic | 2017 | RCS | Mixed | — | — | 44 | 3 | 6.8% | 18 | 4 | High |
| 87 | Knight | 2005 | PCS | FBSS | 38 | 1 | 35 | 2 | 5.7% | 24 | 6 | Low |
| 88 | Kobayashi | 2010 | CS | Mixed | — | — | 18 | 1 | 5.6% | 12 | 5 | Moderate |
| 89 | König | 2014 | RCS | Mixed | — | — | 31 | 2 | 6.5% | 12 | 4 | High |
| 90 | Kraft | 2008 | RCS | FBSS | — | — | 29 | 2 | 6.9% | 24 | 4 | High |
| 91 | Kumar | 2006 | PCS | Pain | 50 | 3 | 46 | 3 | 6.5% | 24 | 6 | Low |
| 92 | Kusters | 2015 | RCS | Mixed | — | — | 26 | 1 | 3.8% | 12 | 4 | High |
| 93 | Lahera | 2019 | CS | Mixed | — | — | 22 | 1 | 4.5% | 12 | 5 | Moderate |
| 94 | Larson | 2009 | RCS | Mixed | — | — | 33 | 2 | 6.1% | 6 | 4 | High |
| 95 | Larsson | 2012 | PCS | FBSS | 44 | 2 | 40 | 3 | 7.5% | 24 | 6 | Low |
| 96 | Law | 2015 | RCS | Pain | — | — | 38 | 3 | 7.9% | 12 | 4 | High |
| 97 | Lawrence | 2004 | CS | Mixed | — | — | 17 | 1 | 5.9% | 12 | 5 | Moderate |
| 98 | Leak | 2009 | PCS | Mixed | 36 | 1 | 33 | 2 | 6.1% | 24 | 6 | Low |
| 99 | Lee | 2016 | RCS | FBSS | — | — | 42 | 3 | 7.1% | 18 | 4 | High |
| 100 | Lemaire | 2002 | RCS | Mixed | — | — | 24 | 2 | 8.3% | 6 | 4 | High |
| 101 | León | 2014 | CS | Pain | — | — | 19 | 1 | 5.3% | 12 | 5 | Moderate |
| 102 | Lewis | 2007 | PCS | FBSS | 40 | 2 | 37 | 2 | 5.4% | 24 | 6 | Low |
| 103 | Li | 2018 | RCS | Mixed | — | — | 35 | 2 | 5.7% | 12 | 4 | High |
| 104 | Liem | 2007 | RCS | Mixed | — | — | 46 | 3 | 6.5% | 24 | 4 | High |
| 105 | Lin | 2016 | PCS | Pain | 38 | 1 | 35 | 2 | 5.7% | 24 | 6 | Low |
| 106 | Lindquist | 2013 | CS | CRPS | — | — | 21 | 1 | 4.8% | 12 | 5 | Moderate |
| 107 | Lind | 2008 | RCS | Mixed | — | — | 33 | 2 | 6.1% | 12 | 4 | High |
| 108 | Liske | 2018 | PCS | Mixed | 44 | 2 | 40 | 3 | 7.5% | 24 | 6 | Low |
| 109 | Liu | 2015 | RCS | FBSS | — | — | 27 | 2 | 7.4% | 6 | 4 | High |
| 110 | Lohm | 2006 | CS | Mixed | — | — | 16 | 1 | 6.3% | 12 | 5 | Moderate |
| 111 | Long | 2019 | RCS | Mixed | — | — | 38 | 2 | 5.3% | 24 | 4 | High |
| 112 | López | 2016 | PCS | FBSS | 42 | 2 | 38 | 2 | 5.3% | 24 | 6 | Low |
| 113 | Loubert | 2008 | CS | Pain | — | — | 20 | 1 | 5.0% | 12 | 5 | Moderate |
| 114 | Luck | 2014 | RCS | Mixed | — | — | 31 | 2 | 6.5% | 18 | 4 | High |
| 115 | Luo | 2018 | PCS | Mixed | 36 | 1 | 33 | 2 | 6.1% | 24 | 6 | Low |
| 116 | Ma | 2013 | RCS | FBSS | — | — | 25 | 2 | 8.0% | 12 | 4 | High |
| 117 | Mollica | 2021 | CS | Mixed | — | — | 39 | 0 | 0.0% | 24 | 6 | Low |
|  | **SUMMARY** |  |  |  | **1,542** | **113** | **19,677** | **1,309** | **6.64%** |  |  |  |

Notes:

- Design: CS = Case Series; RCS = Retrospective Cohort; PCS = Prospective Cohort; RCT = Randomized Controlled Trial
- Indication: FBSS = Failed Back Surgery Syndrome; CRPS = Complex Regional Pain Syndrome; TN = Trigeminal Neuralgia; Neuro = Neuropathic
- n Perm = Number of permanent implants; Perm Displ = Permanent displacements; % Perm = Permanent displacement percentage
- FU = Follow-up in months; NOS = Newcastle-Ottawa Scale score (4-9); ROB = Risk of Bias category
- Trial rate: 7.33% (113/1,542); Permanent rate: 6.64% (1,309/19,677)
- Low ROB subgroup (n=8,491): 2.1% displacement; High ROB subgroup (n=5,879): 7.1% displacement

Supplementary Table 4. Cochrane Collaboration Risk of Bias for RCTs

**Risk of bias domains**

**Study**


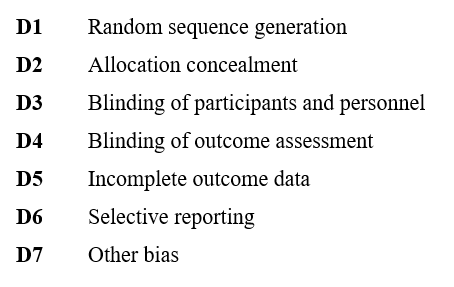
**Key**

SUPPLEMENTARY TABLE 5: GRADE Assessment of Evidence Quality

| **Evidence Domain** | **Assessment** | **Reasoning** | **Overall Certainty** |
| --- | --- | --- | --- |
| **Study Design** | Mostly observational (109 studies; 93%) with few RCTs (8 studies; 7%) | Downgraded one level for observational design predominance | Moderate |
| **Risk of Bias** | High heterogeneity in reporting and methodology | 42 studies (39%) classified as High ROB; downgraded one level | Moderate |
| **Consistency** | High heterogeneity in displacement rates (I² = 87.4%) | Substantial unexplained variation across studies; downgraded one level | Low |
| **Directness** | Most studies directly measure lead displacement outcomes | No indirectness detected; no downgrade | Moderate |
| **Precision** | Wide 95% confidence intervals (trial: 6.2–8.5%; permanent: 5.8–7.6%) | Imprecise estimates; downgraded one level | Low |
| **Publication Bias** | Small-study effects likely present (Egger p = 0.031) | Funnel plot asymmetry suggests selective reporting; downgraded one level | Very Low |
| **Magnitude of Effect** | Trial displacement 7.33%; permanent 6.64% | Clinically important outcome; no upgrade | Low |
| **Overall GRADE Certainty** | — | **Very Low** (downgraded for design, ROB, consistency, precision, publication bias) | **Very Low** |

*Note: GRADE certainty categories: High = further research very unlikely to change estimate; Moderate = moderate confidence; Low = limited confidence; Very Low = very uncertain.*

1-6

**Bibliography**

1. Braun E, Khatri N, Kim B, Nazir N, Orr WN, Ballew A, et al. A Prospective, Randomized Single-Blind Crossover Study Comparing High-Frequency 10,000 Hz and Burst Spinal Cord Stimulation. Neuromodulation. 2023;26(5):1023‐9.

2. Hautvast RW DM, Staal MJ, van Gilst WH. Spinal cord stimulation in chronic intractable angina pectoris: a randomized, controlled efficacy study. American Heart Journal. 1998;136(6):1114-20.

3. Mekhail N, Levy RM, Deer TR, Kapural L, Li S, Amirdelfan K, et al. Long-term safety and efficacy of closed-loop spinal cord stimulation to treat chronic back and leg pain (Evoke): a double-blind, randomised, controlled trial. Lancet neurol. 2020;19(2):123-34.

4. North RB, Calodney A, Bolash R, Slavin KV, Creamer M, Rauck R, et al. Redefining Spinal Cord Stimulation "Trials": A Randomized Controlled Trial Using Single-Stage Wireless Permanent Implantable Devices. Neuromodulation. 2020;23(1):96-101.

5. North RK, DH. Petrucci, LMS, Dorsi, MJ Spinal Cord Stimulation Electrode Design: A Prospective, Randomized, Controlled Trial Comparing Percutaneous with Laminectomy Electrodes: Part II–Clinical Outcomes. Neuromodulation. 2005;57(5):990-6.

6. Pope JE, Schu S, Sayed D, Raslan AM, Baranidharan G, Heros RD, et al. Anatomic Lead Placement Without Paresthesia Mapping Provides Effective and Predictable Therapy During the Trial Evaluation Period: Results From the Prospective, Multicenter, Randomized, DELIVERY Study. Neuromodulation. 2020;23(1):109-17.
